# Supplementary material for: Lysinuric Protein Intolerance and Its Nutritional and Multisystemic Challenges in Pregnancy: A Case Report and Literature Review
Source: MDPI journal article supplement (doi:10.3390/jcm12196405), 2023-10-08
Supplement: s1 [file s1]

**Supplementary Table S1.** Natural and dietary products provided throughout pregnancy.

|                                                                                                                                                                                                                                                                                                                     |
|---------------------------------------------------------------------------------------------------------------------------------------------------------------------------------------------------------------------------------------------------------------------------------------------------------------------|
| <p><b>Commercial multifruit juice concentrate: Pineapple, Orange, Apple, Apricot, Grapes</b><br/>(Eckes-Granini Iberica, S.A.U, Barcelona, Spain)</p> <p><i>Nutritional information is expressed per 100mL.</i></p> <p>Energy 52.0Kcal; Carbohydrates 11.9g; Proteins 0.5g; Fat 0.1g.</p>                           |
| <p><b>L-citrulline (Nutricia N.V., Zoetermeer, The Netherlands)</b></p> <p>A powdered form of the amino acid L-citrulline.</p> <p><i>Nutritional information is expressed per 100g.</i></p> <p>Energy 359.0kcal; Carbohydrates 0.0g; Protein equivalents 89.7g; L-citrulline 100.0 g; Fat 0.0g.</p>                 |
| <p><b>Medium-chain triglycerides oil (Nutricia N.V., Zoetermeer, The Netherlands)</b></p> <p>A liquid containing a mixture of medium-chain triglycerides (MCT).</p> <p><i>Nutritional information is expressed per 100mL.</i></p> <p>Energy 855.0Kcal; Carbohydrates 0.0g; Protein equivalents 0.0g; Fat 95.0g.</p> |
| <p><b>Duocal® (Nutricia N.V., Zoetermeer, The Netherlands)</b></p> <p>A high-energy powdered product that contains a dual energy source of carbohydrates and fat.</p> <p><i>Nutritional information is expressed per 100g.</i></p> <p>Energy 492.0Kcal; Carbohydrates 72.7g; Fat 22.3 g (saturated fat 10.4 g).</p> |
| <p><b>Vitajoule® (Vitaflo a Nestlé Health Science Company, Vevey, Switzerland)</b></p> <p>A carbohydrate powder supplement with no fat content.</p> <p><i>Nutritional information is expressed per 100g.</i></p> <p>Energy 380.0 Kcal; Carbohydrates 95.0 g; Fat 0.0g.</p>                                          |

**EAA Supplement® (Vitaflo a Nestlé Health Science Company, Vevey, Switzerland)**

Unflavored powder mix of essential amino acids and carbohydrates.

*Nutritional information is expressed per 100g.*

Energy 265.0 Kcal; Protein equivalents 40.0 g; Carbohydrates 26.0g; Fat 0.1g.

L-cysteine 1.9g; L-phenylalanine 3.6g; L-histidine 1.9g; L-leucine 10.5g; L-lysine 7.1g; L-isoleucine 6.1g; L-methionine 1.9g; L-tyrosine 5.0g; L-threonine 4.4g; L-tryptophan 1.4g; L-valine 7.7 g.
